# Supplementary material for: Organic–inorganic hybrid tetrachlorocadmates as promising fluorescent agents for cross-linked polyurethanes: synthesis, crystal structures and extended performance analysis
Source: Royal Society of Chemistry journal article supplement (doi:10.1039/d0ra10787e), 2021-01-01
Supplement: d0ra10787e1.pdf [file d0ra10787e1.pdf]

## Organic-inorganic hybrid tetrachlorocadmates as promising fluorescent agents for cross-linked polyurethanes: synthesis, crystal structures and extended performance analysis

Olga Yu. Vassilyeva, Elena A. Buvaylo, Yevheniia V. Lobko, Rostyslav P. Linnik, Vladimir N. Kokozay, and Brian W. Skelton

### Supplementary Information

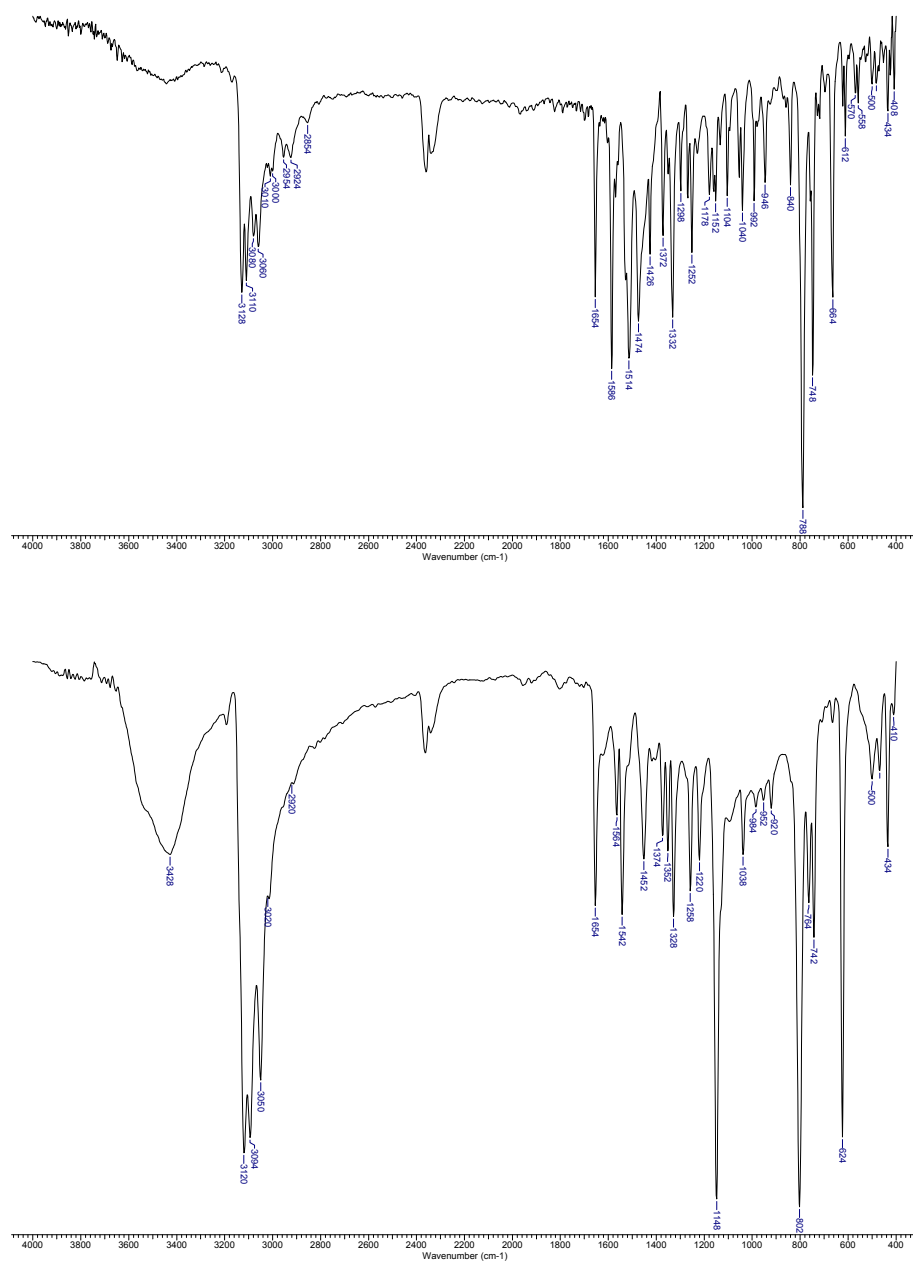

Figure S1. IR spectra of  $[L]_2[CdCl_4]$  (**1** top) and  $[L']_2[CdCl_4]$  (**2**, bottom).

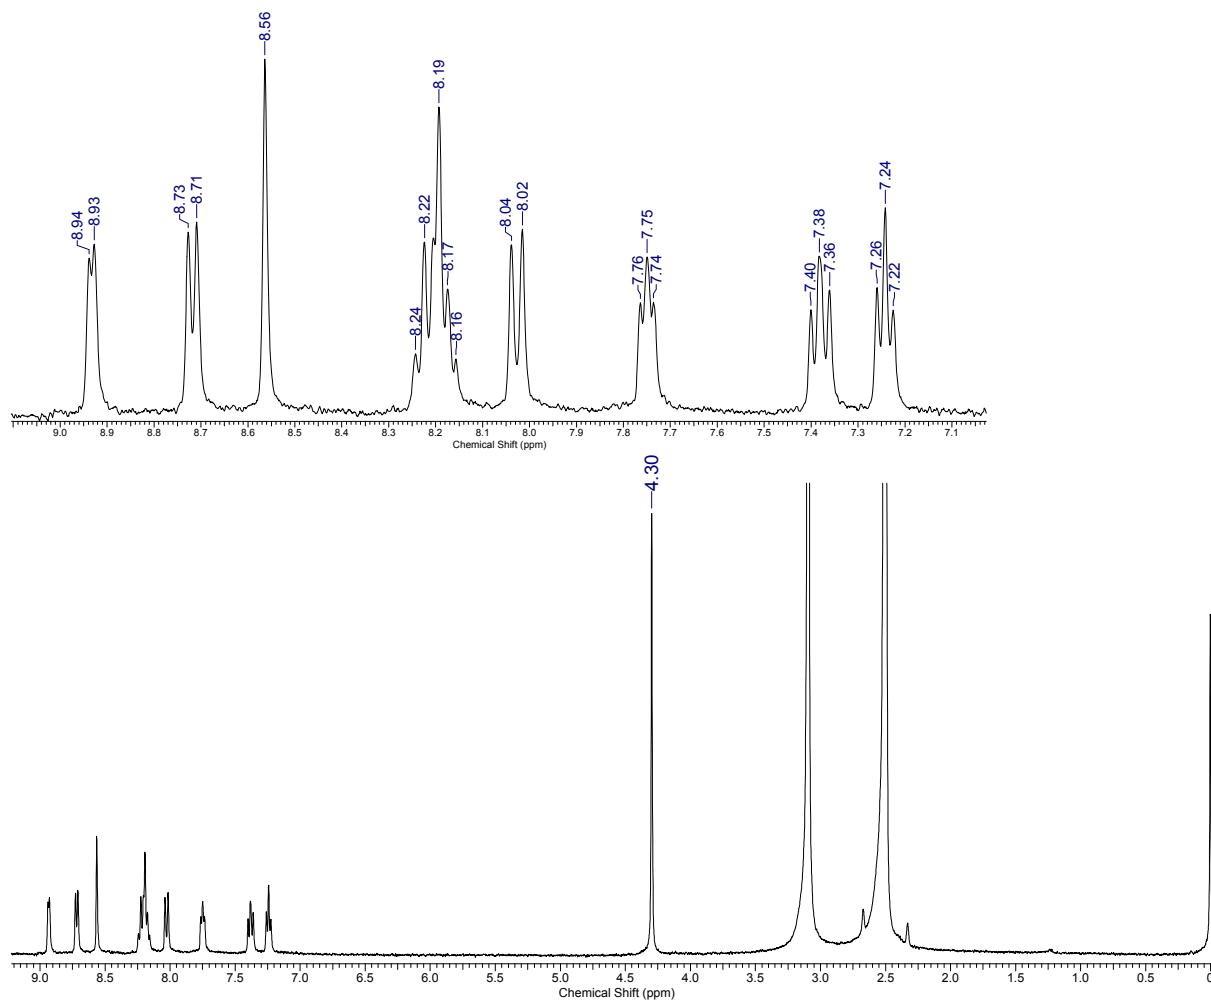

Figure S2. 400 MHz <sup>1</sup>H NMR spectrum of [L]<sub>2</sub>[CdCl<sub>4</sub>] (1) in DMSO-*d*<sub>6</sub> at 293 K in the ranges 9–7 ppm (top) and 9–0 ppm (bottom).

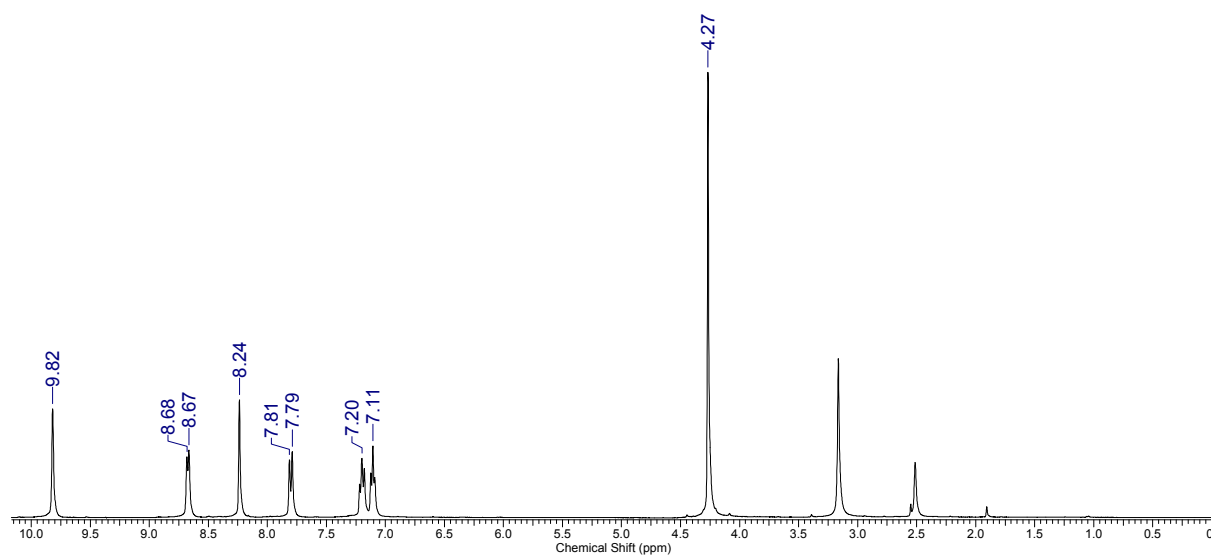

Figure S3. 400 MHz <sup>1</sup>H NMR spectrum of [L']<sub>2</sub>[CdCl<sub>4</sub>] (2) in DMSO-*d*<sub>6</sub> at 293 K between 10 and 0 ppm.

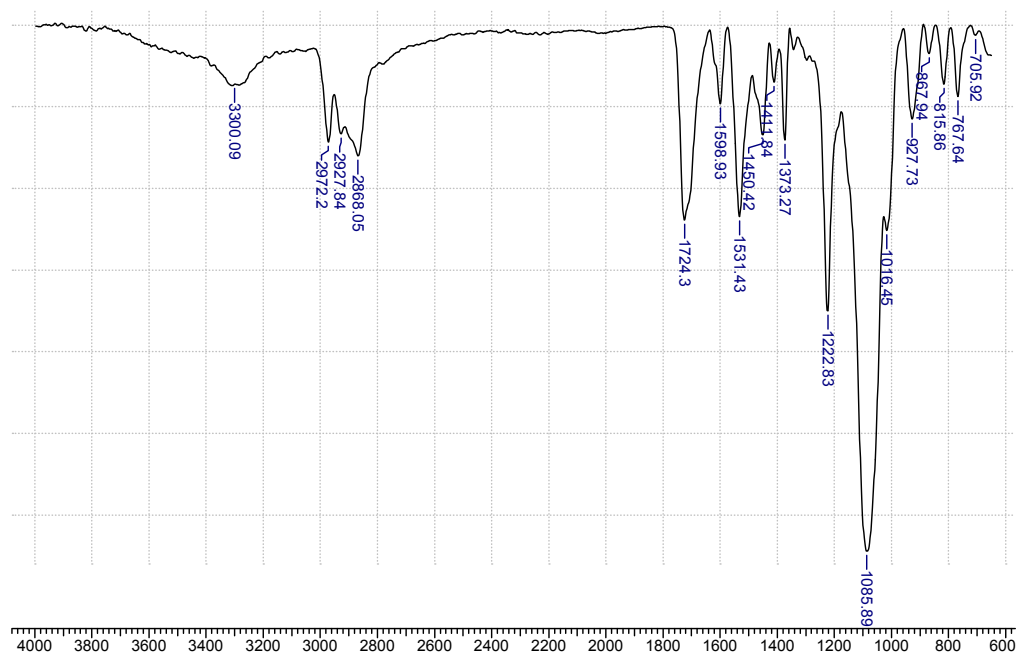

Figure S4. IR spectrum of the neat cross-linked polyurethane.
